# Supplementary material for: Genomic rearrangements and signatures of breeding in the allo-octoploid strawberry as revealed through an allele dose based SSR linkage map
Source: PubMed Central journal article supplement (PMC3944823; doi:10.1186/1471-2229-14-55), 2014-03-01

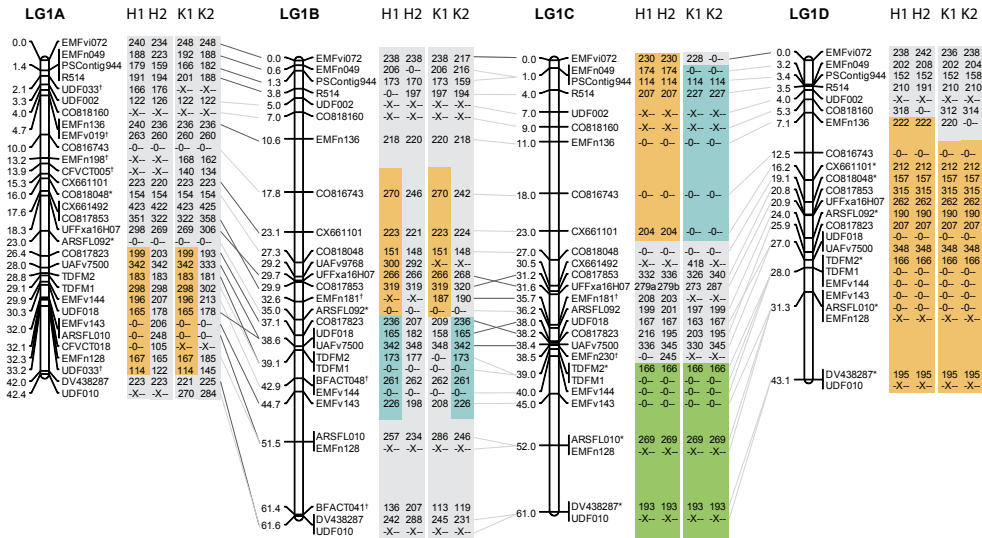

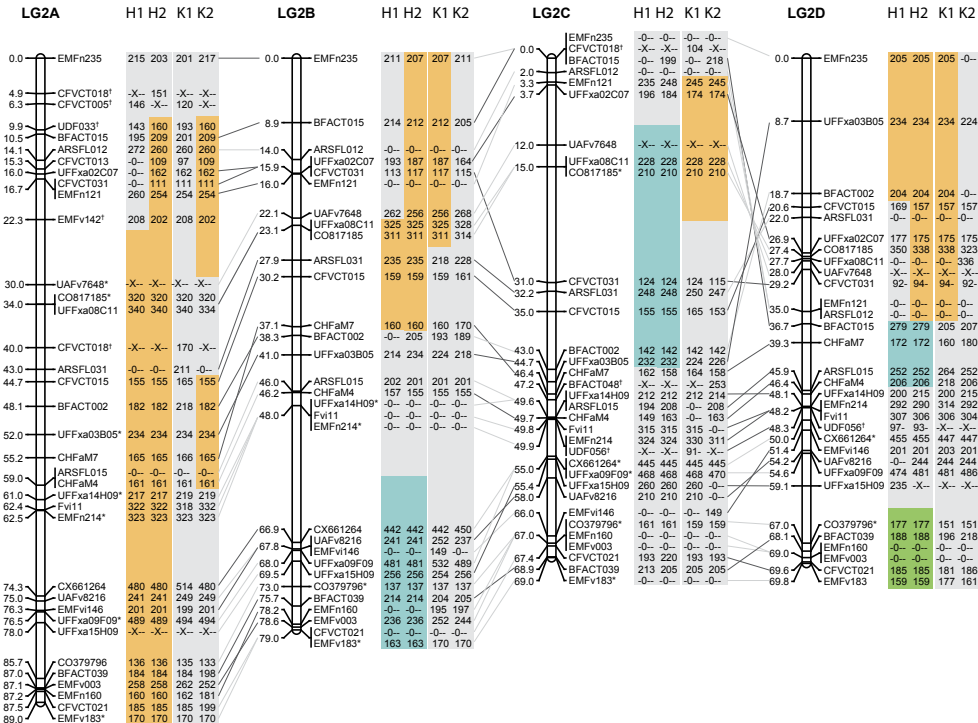

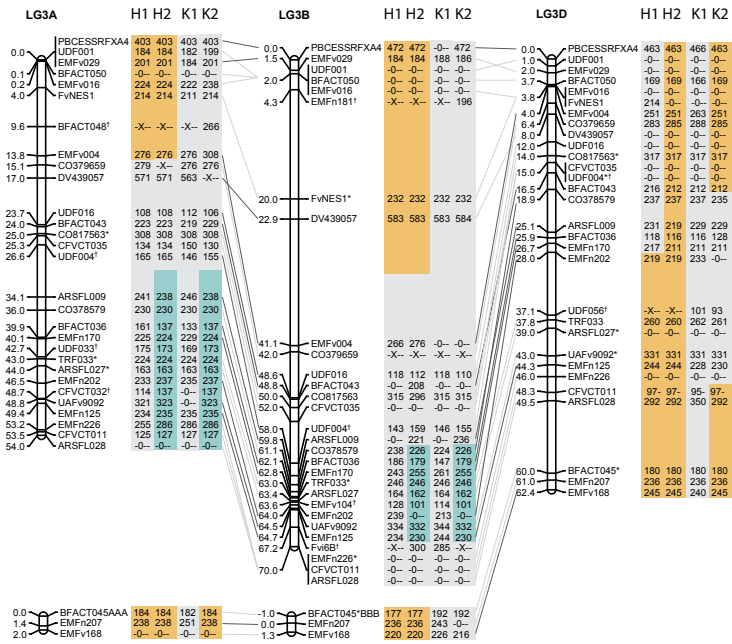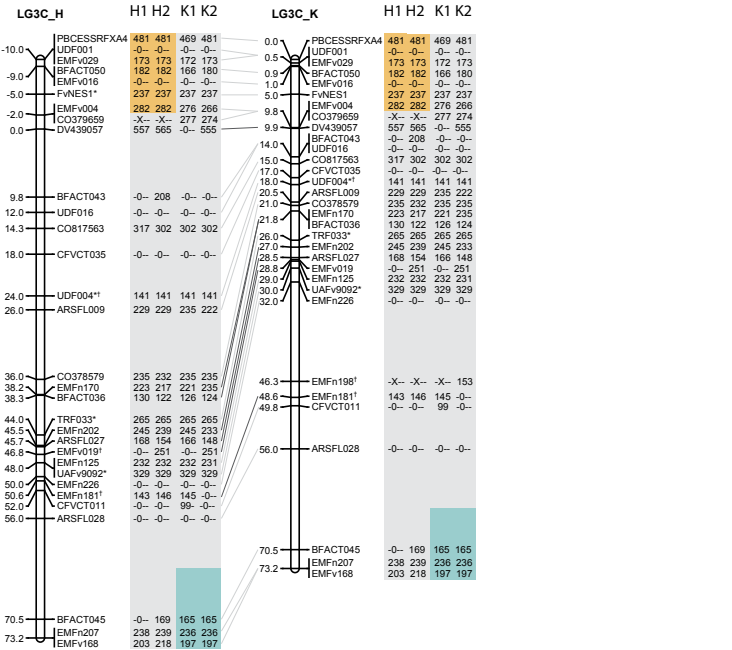

### LG4A

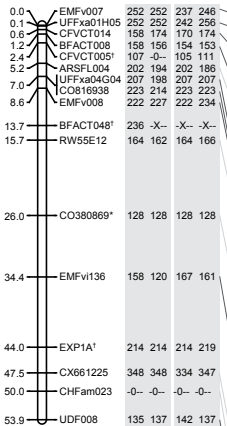

### LG4B

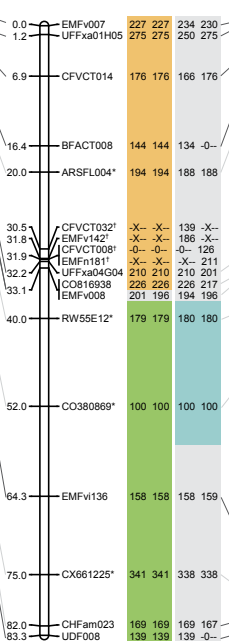

### LG4C

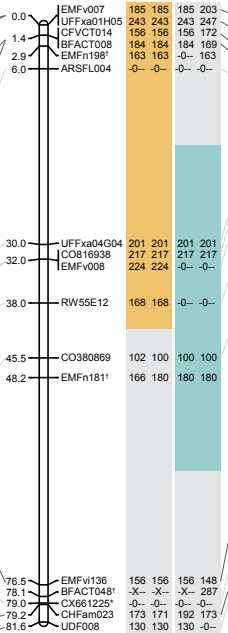

### LG4D

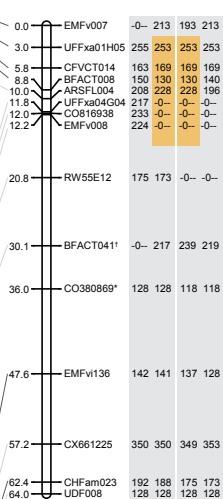

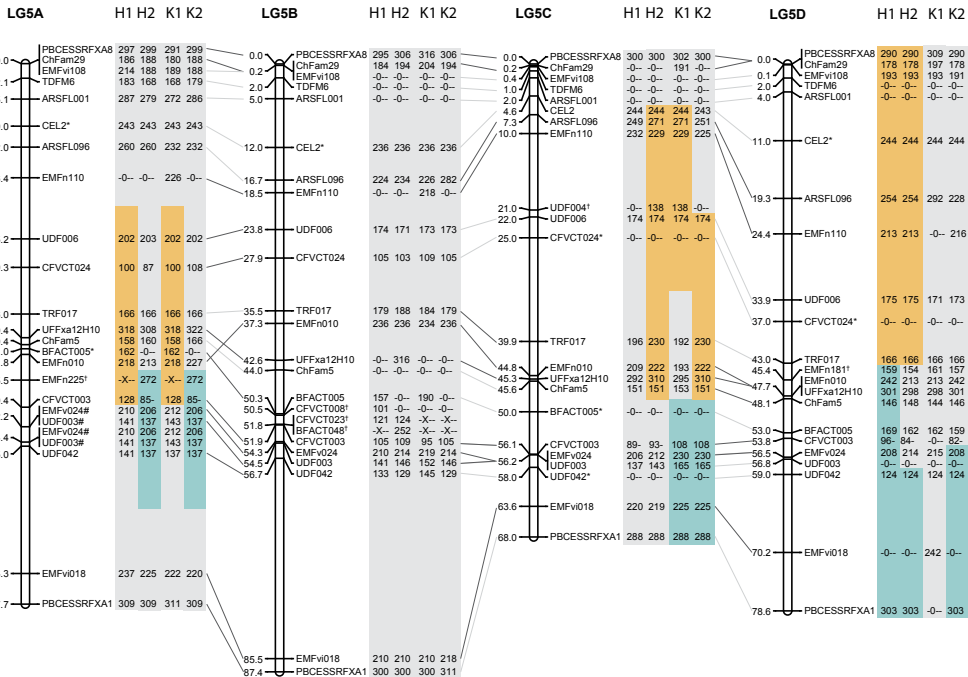

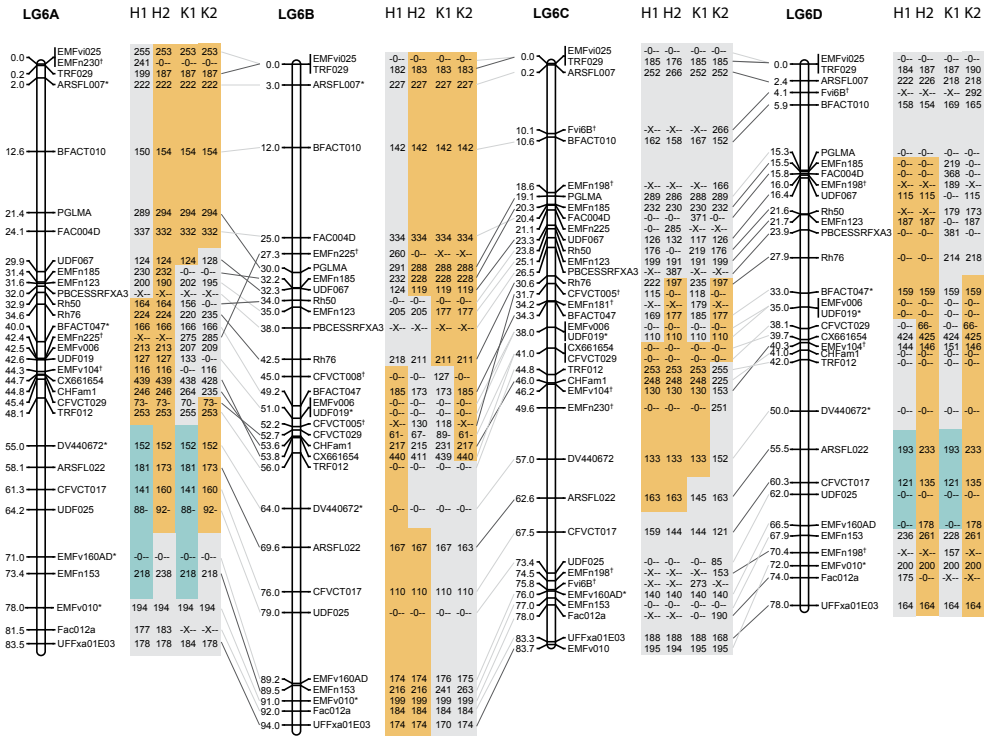

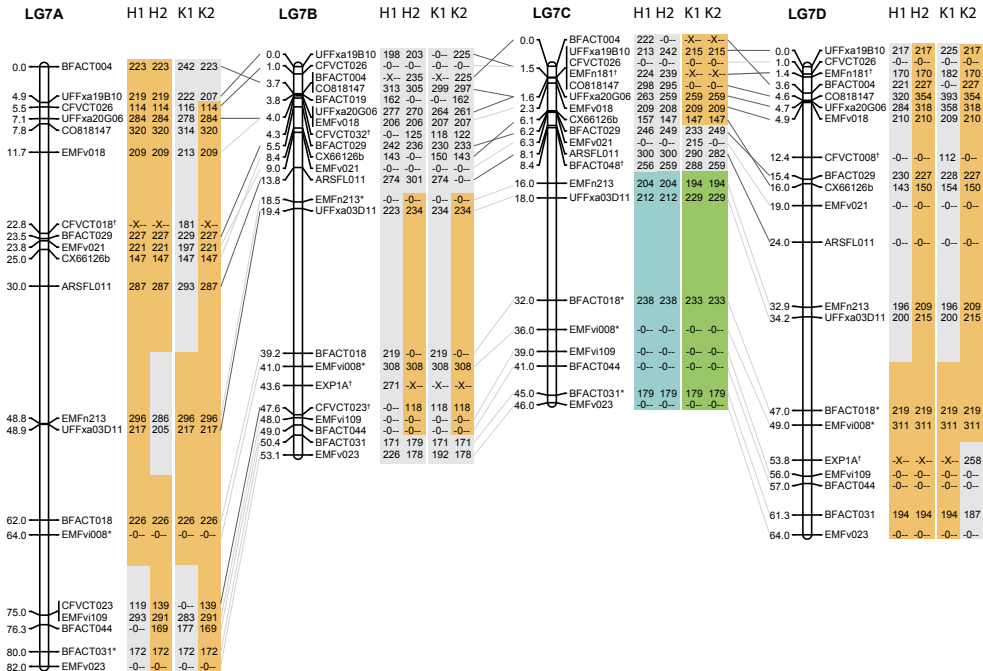

Supplement: 1471-2229-14-55-S2.pdf [file 1471-2229-14-55-S2.pdf]
