# Supplementary material for: Genomic rearrangements and signatures of breeding in the allo-octoploid strawberry as revealed through an allele dose based SSR linkage map
Source: PubMed Central journal article supplement (PMC3944823; doi:10.1186/1471-2229-14-55), 2014-03-01

# LG1-physical

# HxK 1B

# FvxFb 1

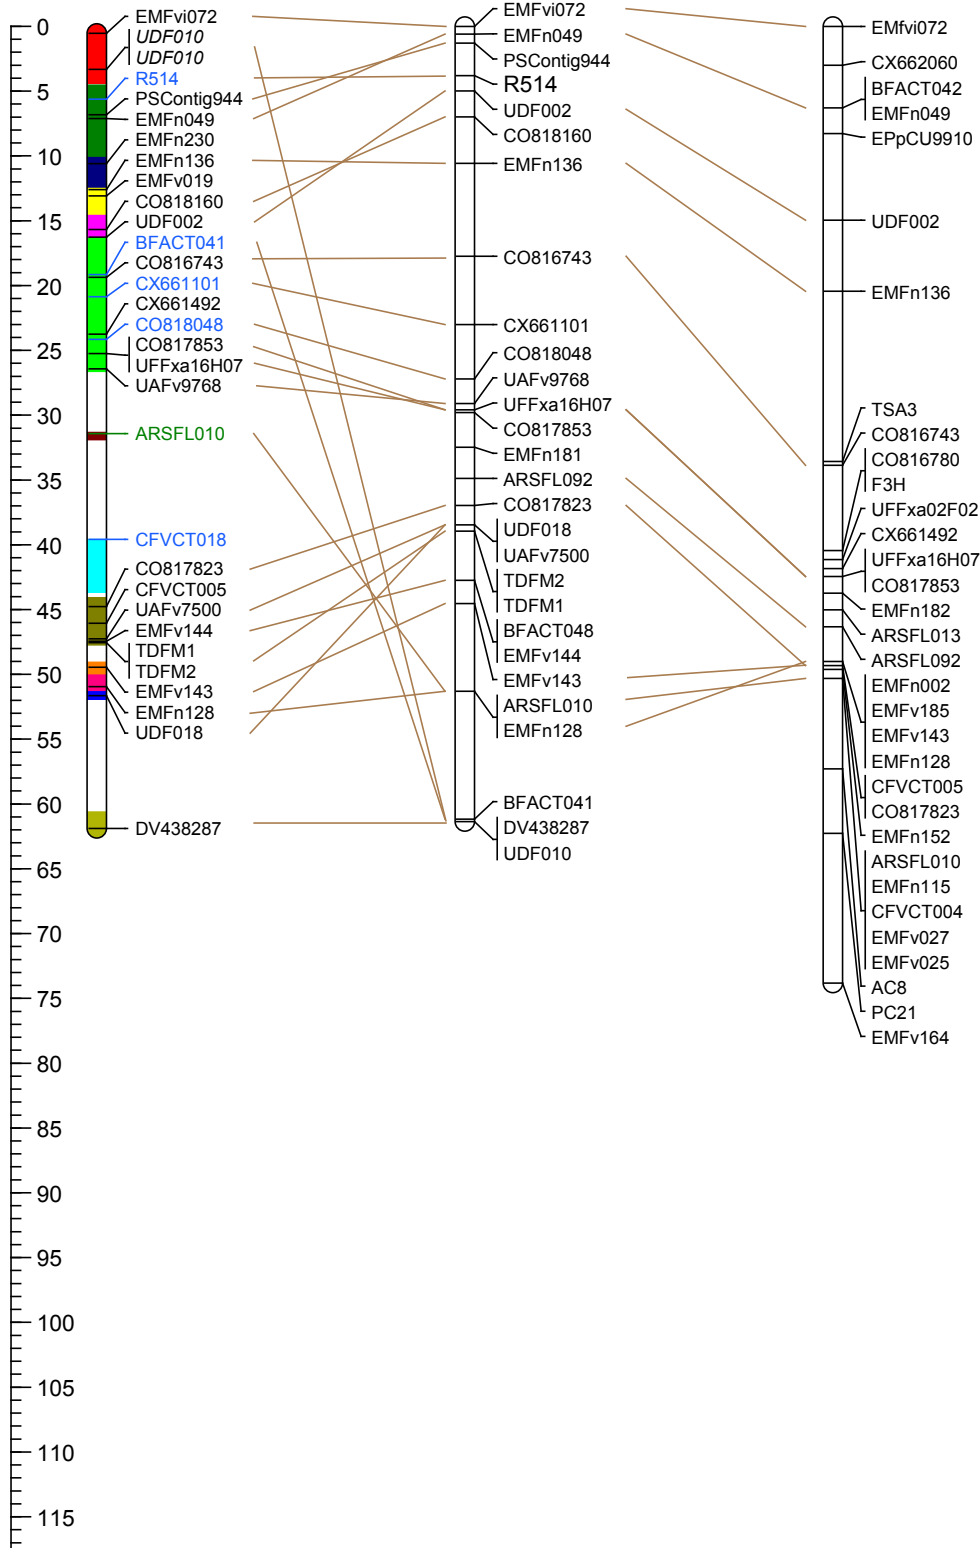

# LG2-physical

# HxK 2A

# FvxFb 2

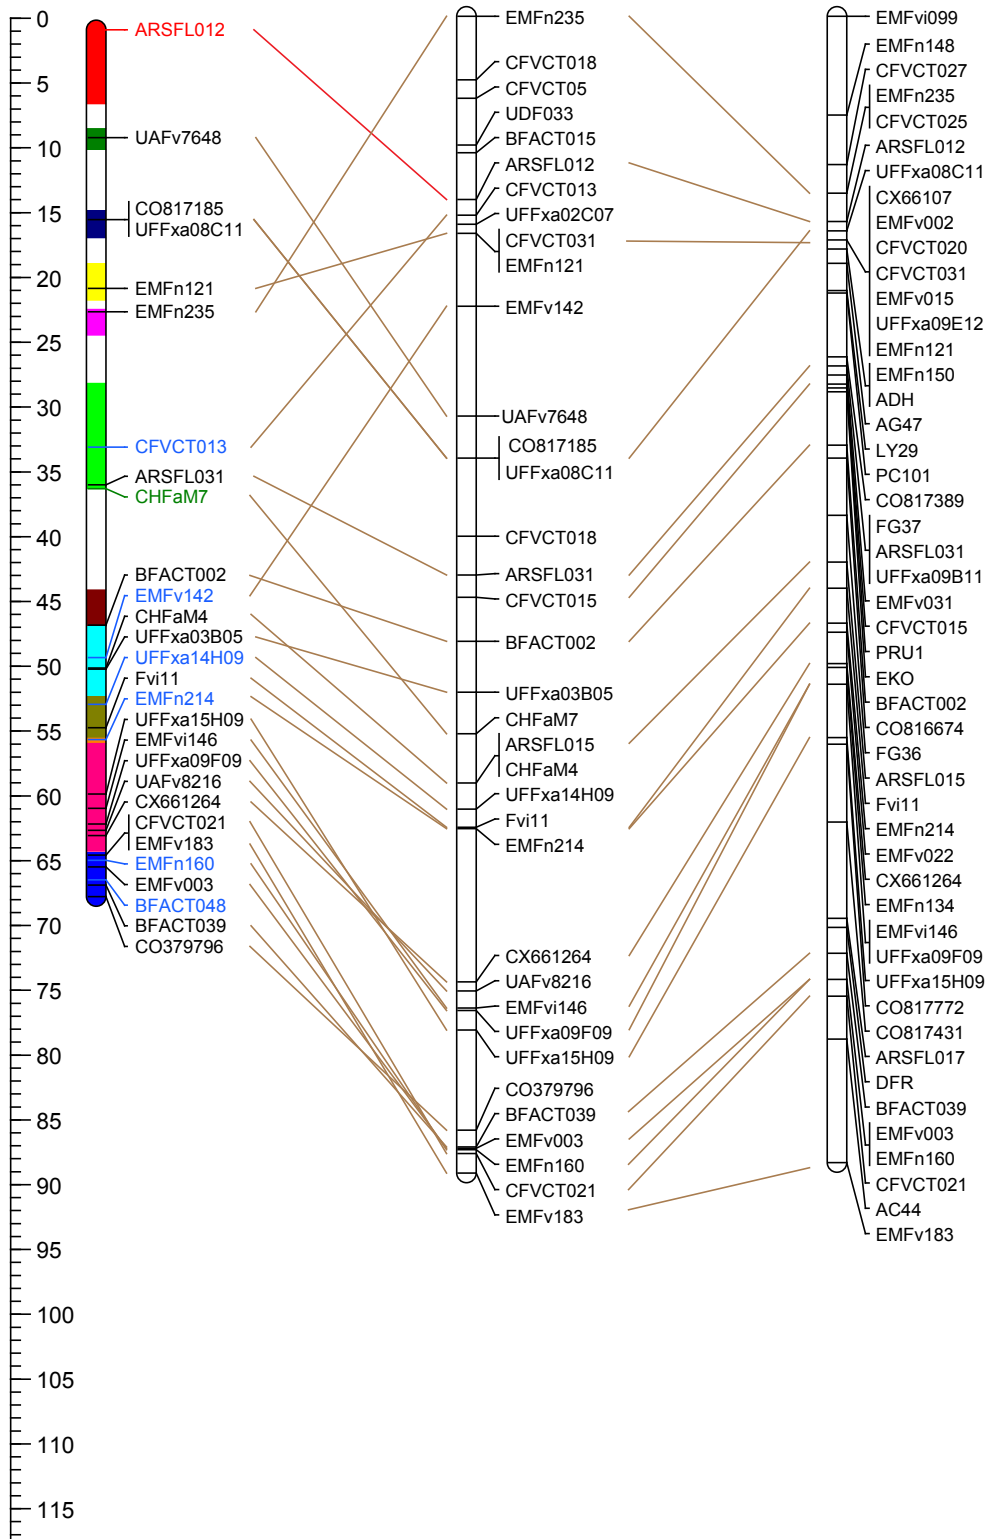

### LG3-physical

### HxK 3D

### FvxFb 3

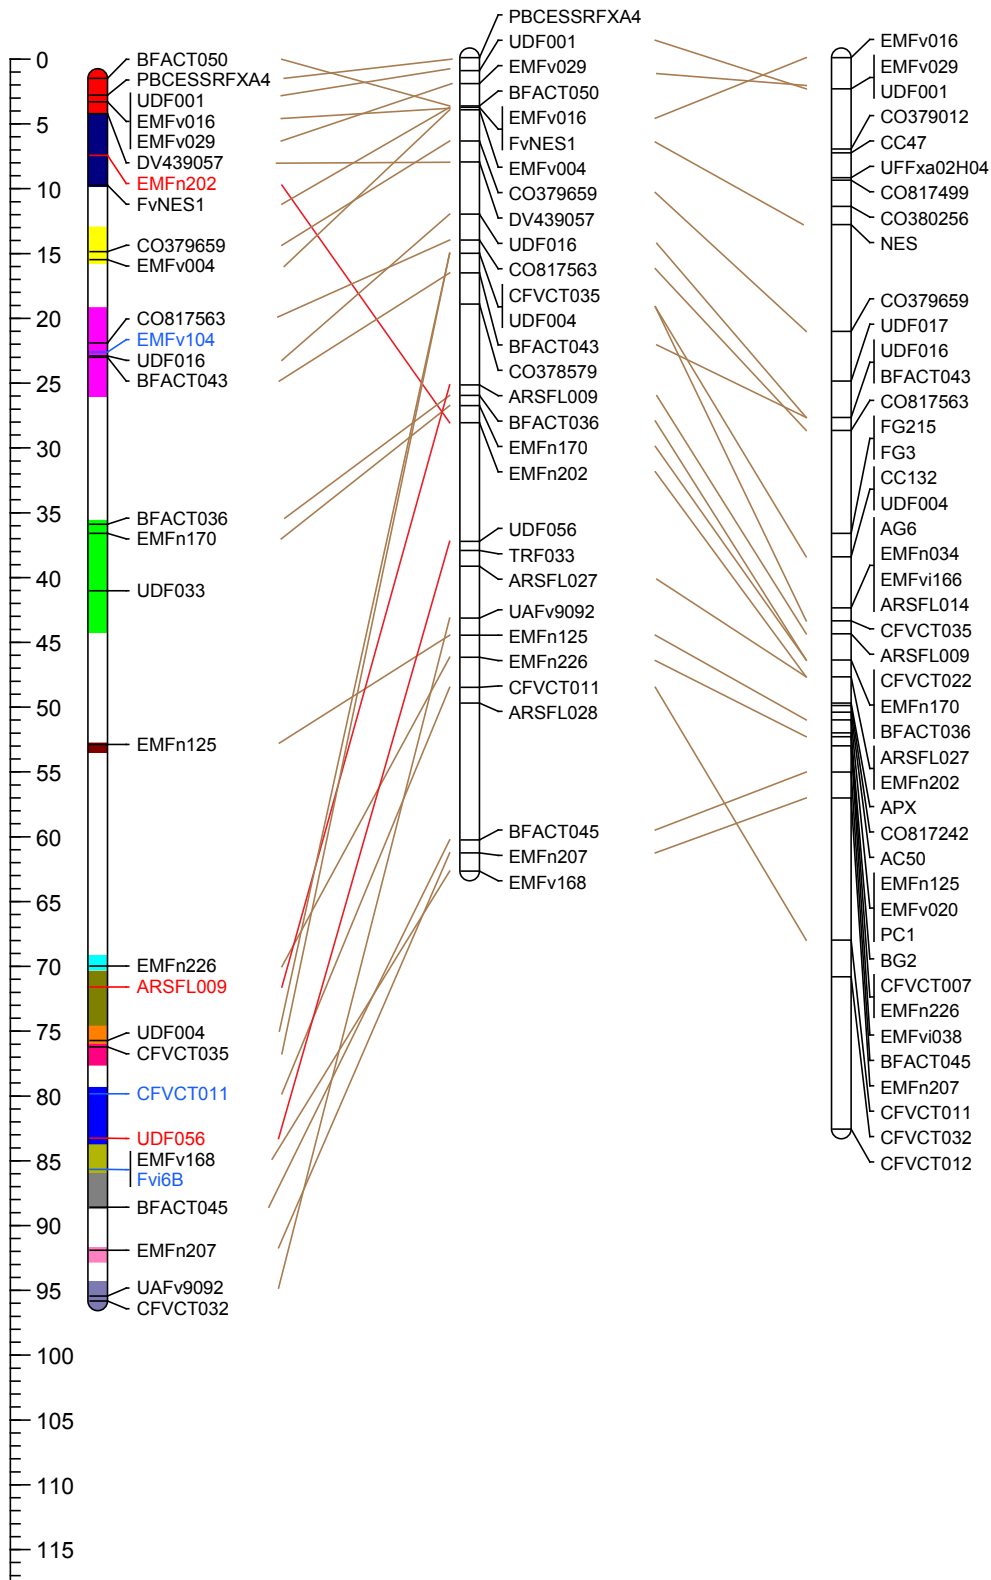

# LG4-physical

# HxK 4A

# FvxFb4

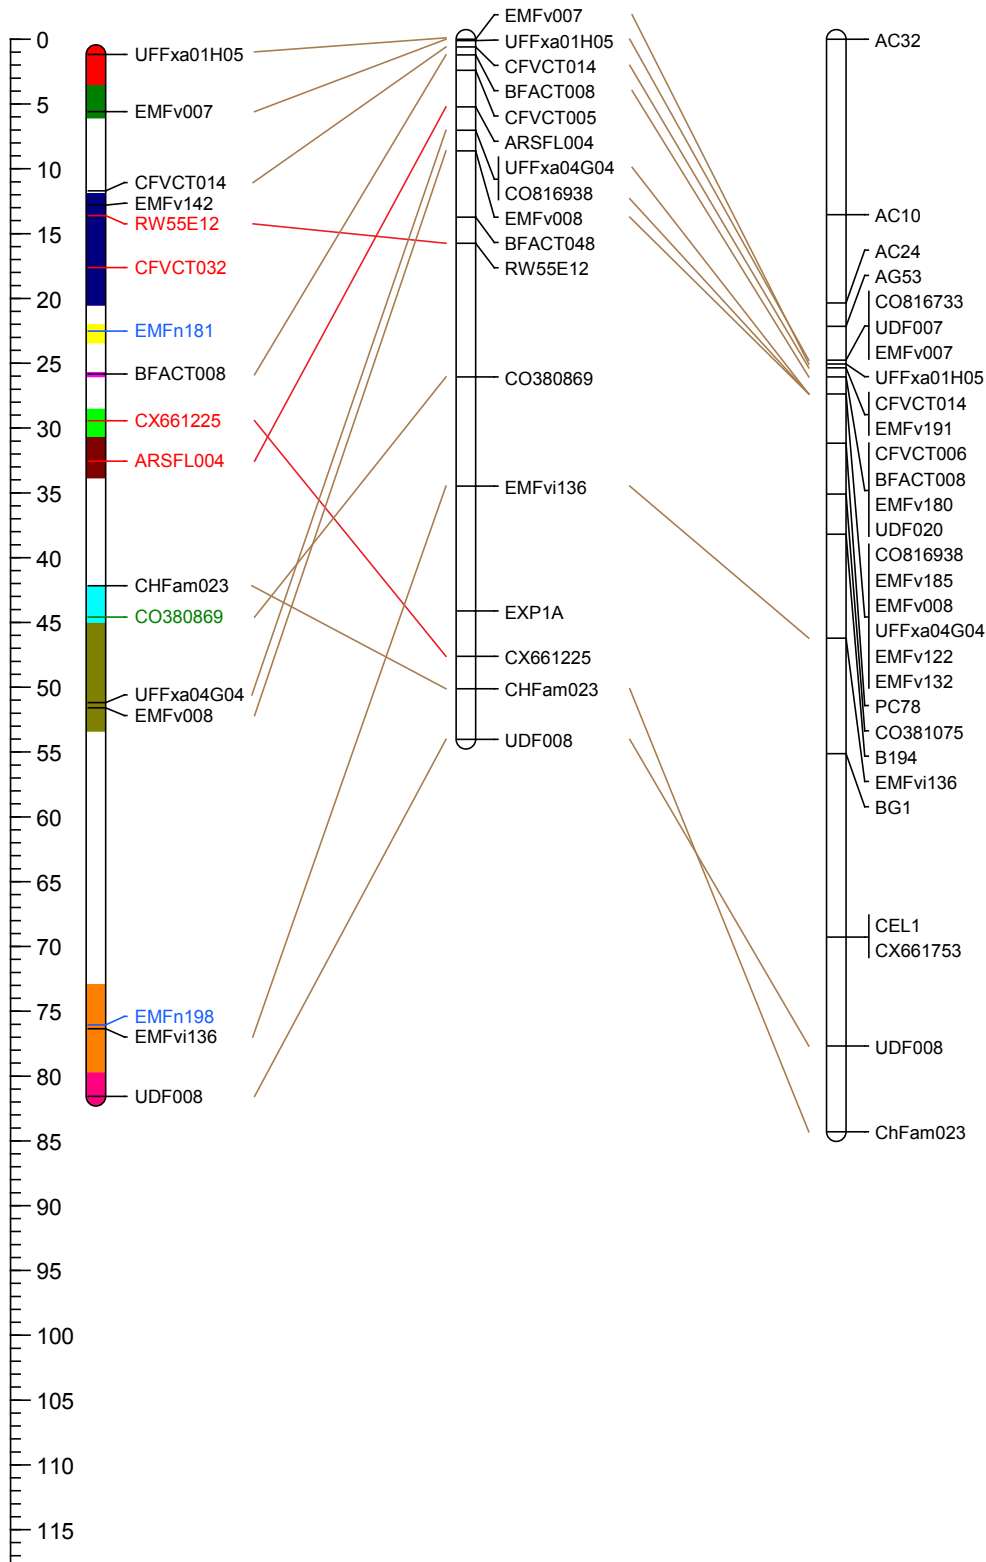

# LG5-physical

# HxK 5D

# FvxFb 5

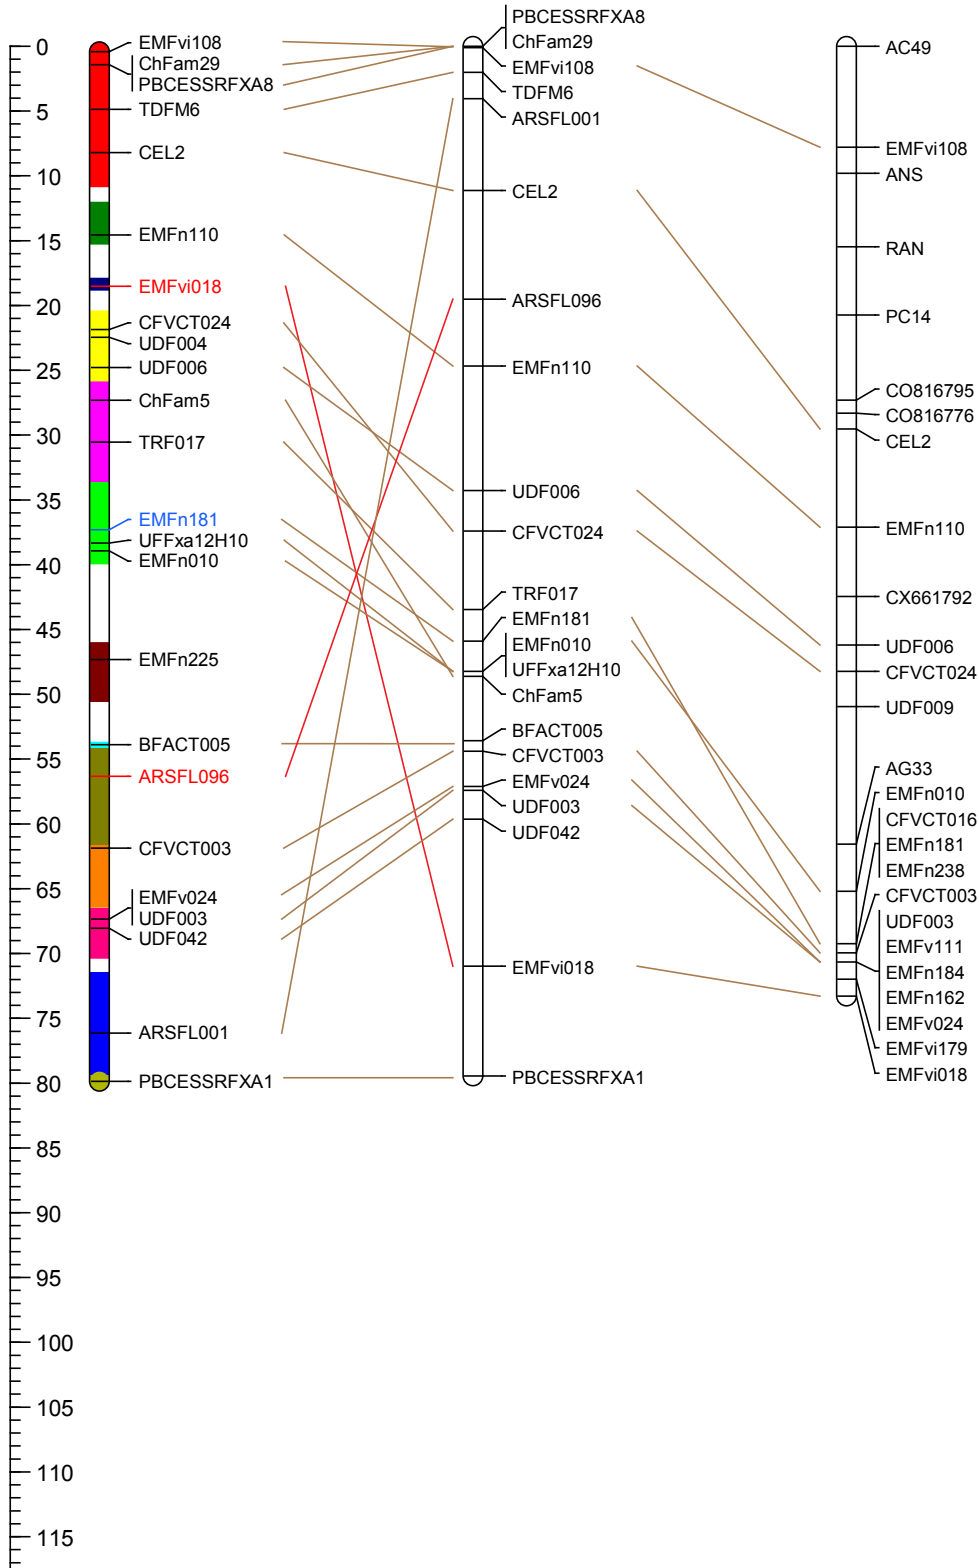

### LG6-physical

### HxK 6A

### FvxFb 6

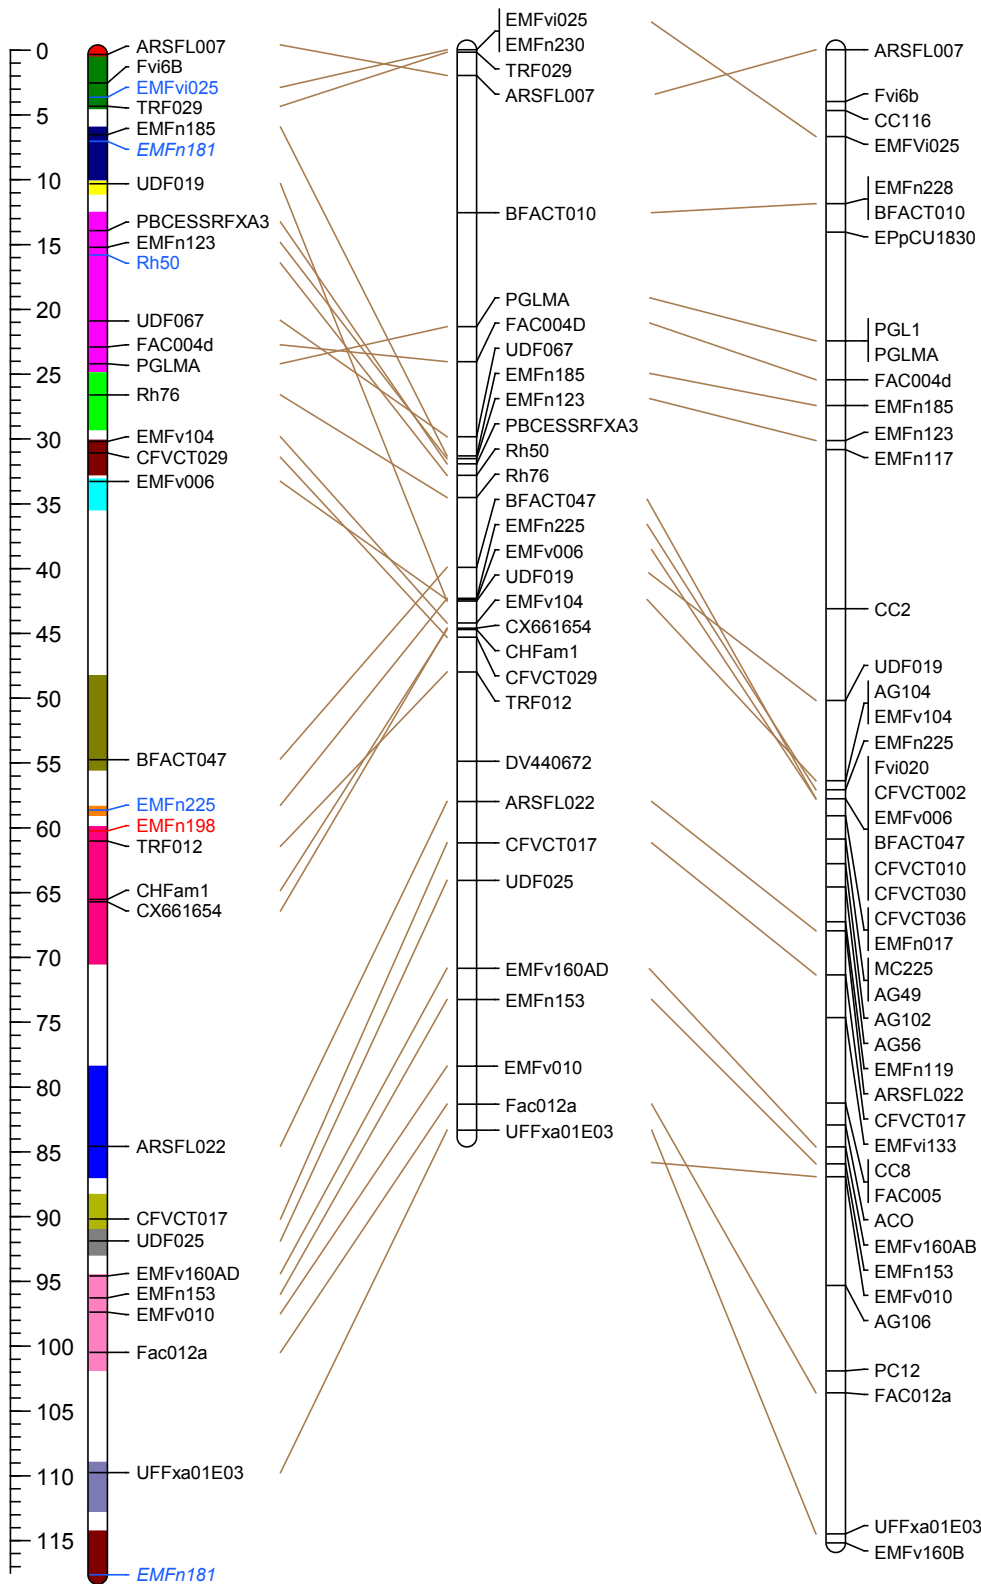

# LG7-physical

# HxK 7B

# FvxFb 7

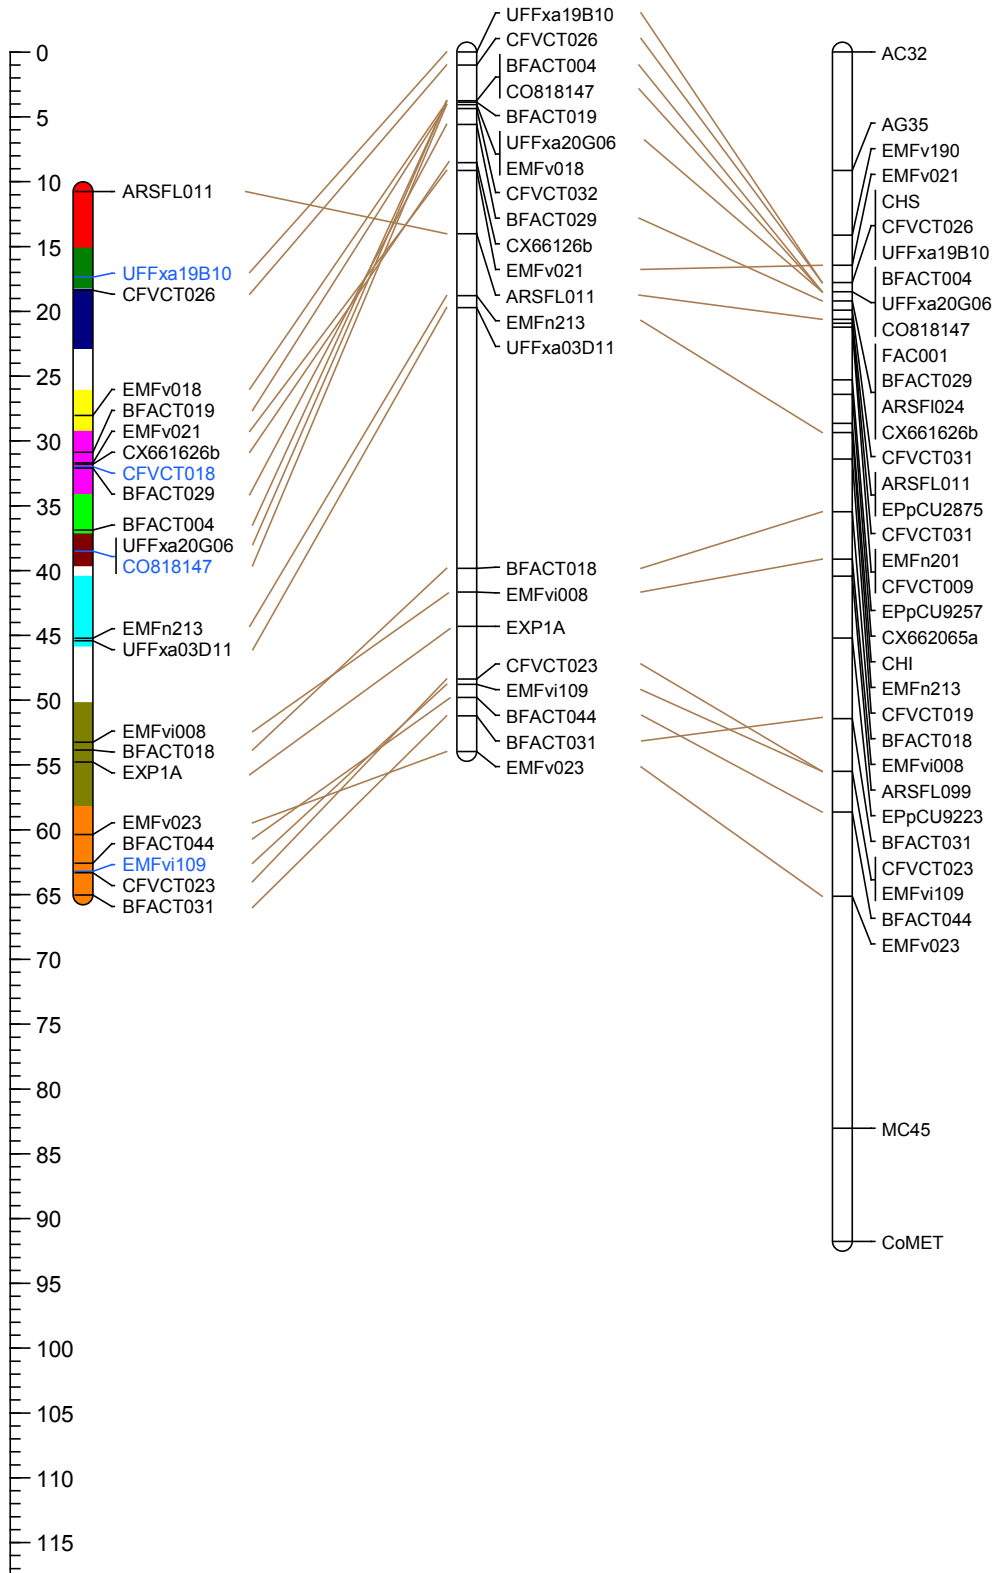

Supplement: 1471-2229-14-55-S3.pdf [file 1471-2229-14-55-S3.pdf]
